# Supplementary material
Source: Springer Nature journal article supplement (https://www.springermedizin.de/resource/supplementary/12936_2007_404_MOESM3_ESM.pdf/9547730)

**a**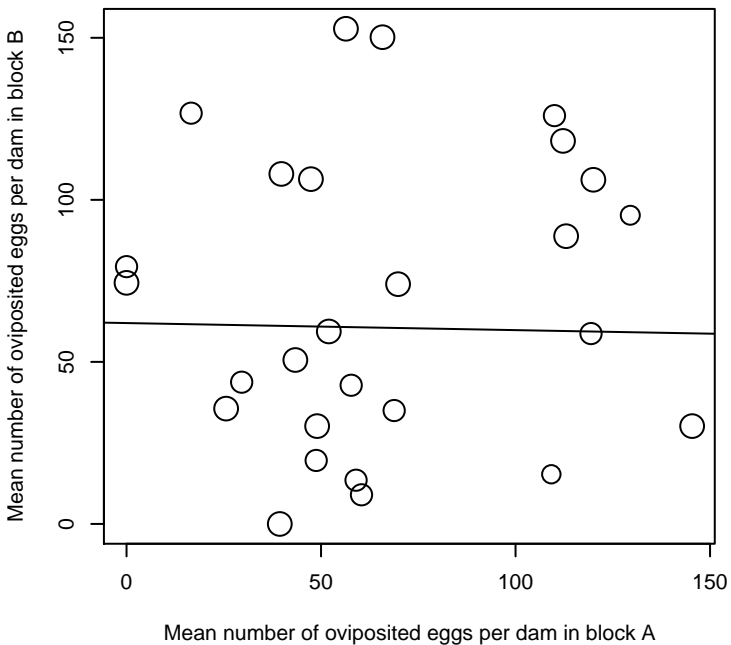**b**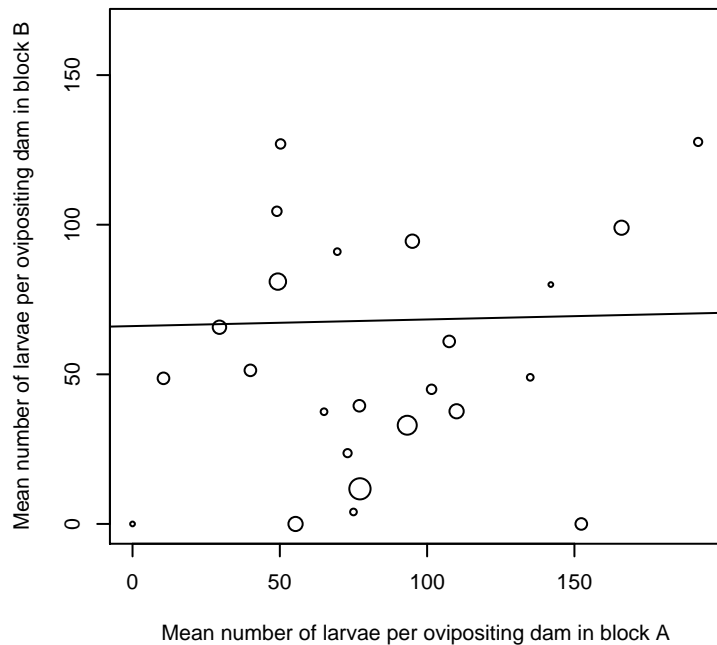**c**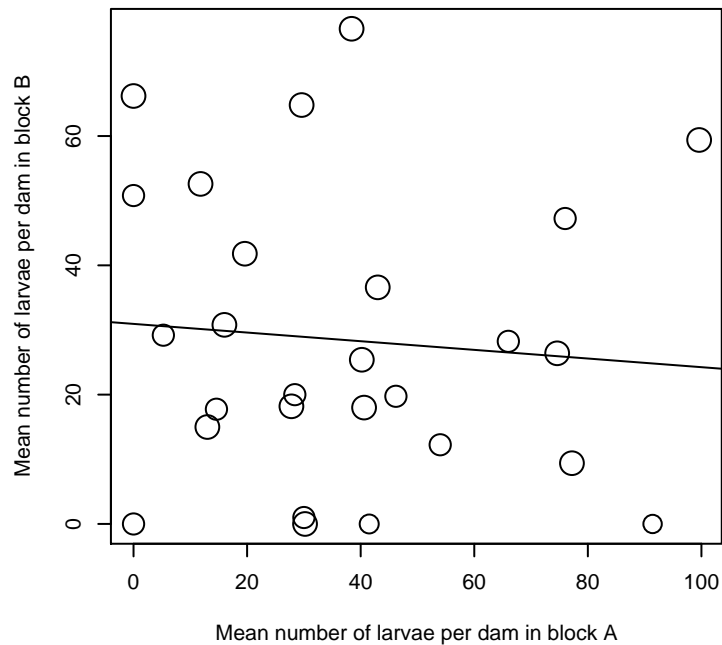

Supplement: MOESM3 [file 9547730]
